# Supplementary material
Source: Springer Nature journal article supplement (https://www.springermedizin.de/resource/supplementary/13054_2013_1893_MOESM1_ESM.pdf/9711794)
Supplement: MOESM1 [file 9711794]

60 Non duplicate records identified  
in initial database search

56 excluded for not referring to  
comparison on NG and NJ feeding

4 studies remained for qualitative  
synthesis

1 non randomized controlled trial  
was excluded

3 eligible studies included in the  
final analysis
